# Supplementary material for: T2N as a new tool for robust electrophysiological modeling demonstrated for mature and adult-born dentate granule cells
Source: eLife journal article supplement (doi:10.7554/elife.26517), 2017-11-22

Fig. 3-fig suppl 4

Experiment

Model (Aradi&Holmes 1999)

(Reconstructed morphologies)

(Synthetic morphologies)

**A**

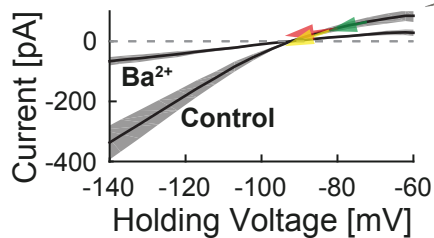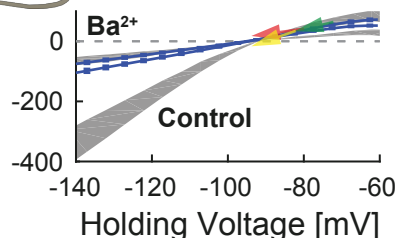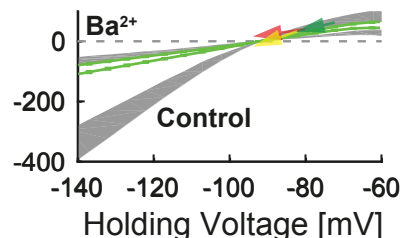

**B**

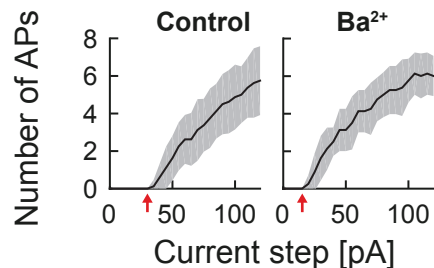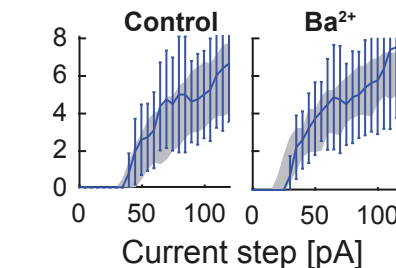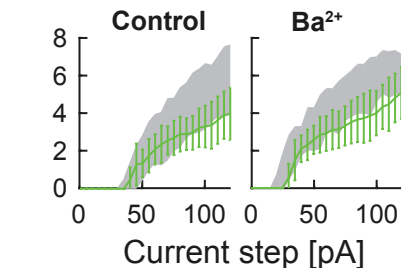

**C**

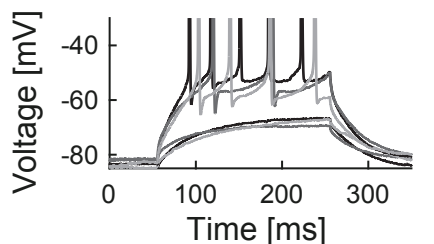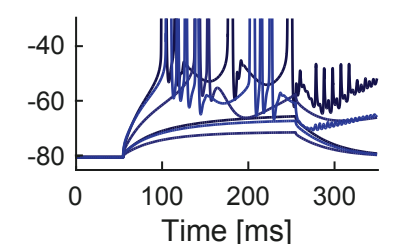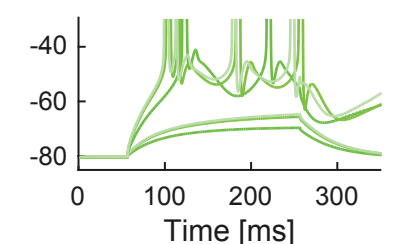

**D**

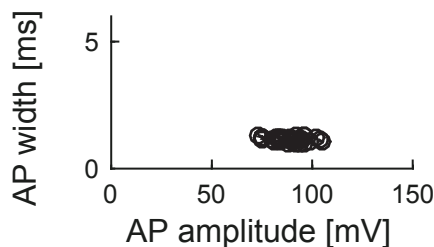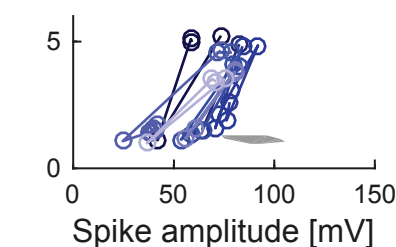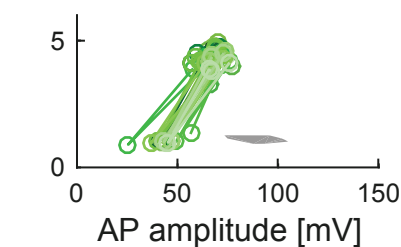

**E**

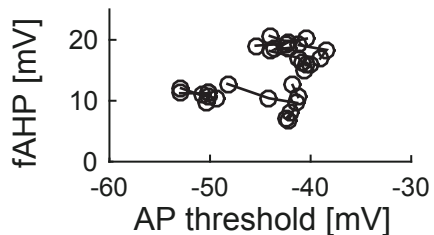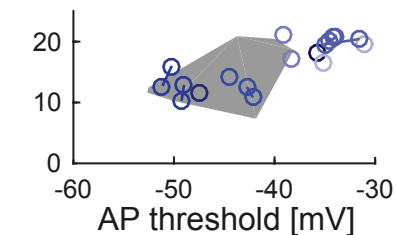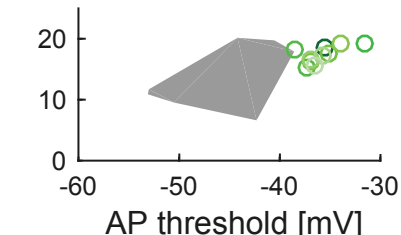

**F**

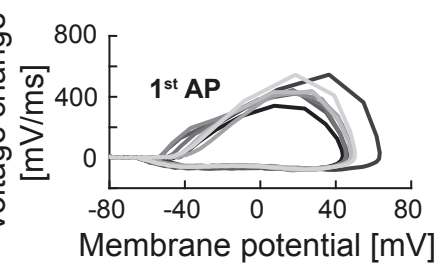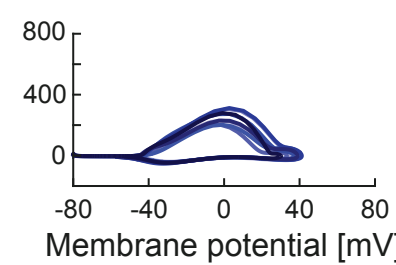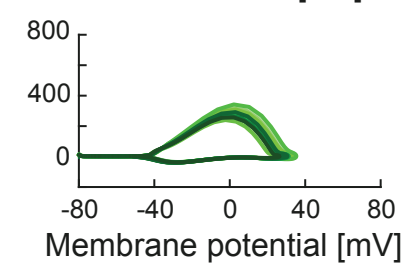

Supplement: supp [file elife-26517-supp-v2.zip]
