# Supplementary material for: T2N as a new tool for robust electrophysiological modeling demonstrated for mature and adult-born dentate granule cells
Source: eLife journal article supplement (doi:10.7554/elife.26517), 2017-11-22
Supplement: supp [file elife-26517-supp-v2.zip]

*Fig. 3-fig suppl 2*

## Influence of morphology on electrophysiological properties

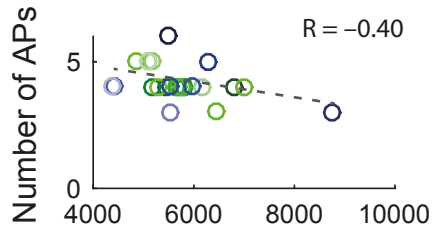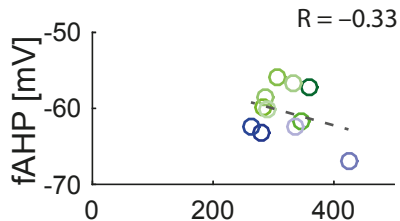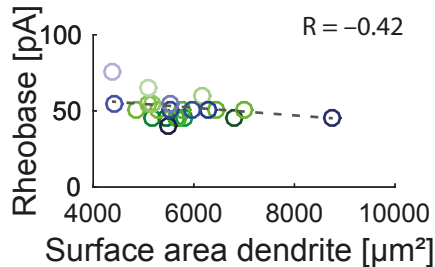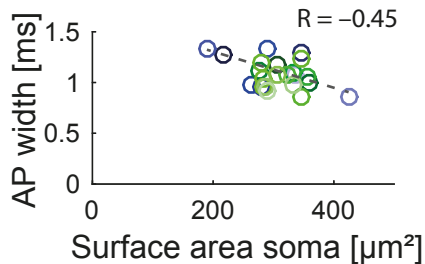

- Simulation (reconstructed GCs)
- Simulation (synthetic GCs)
