# Supplementary material for: T2N as a new tool for robust electrophysiological modeling demonstrated for mature and adult-born dentate granule cells
Source: eLife journal article supplement (doi:10.7554/elife.26517), 2017-11-22

*Fig. 3-fig suppl 1*

## Current dynamics during voltage clamp

Experimental data

Simulation (reconstructed GCs)

Simulation (synthetic GCs)

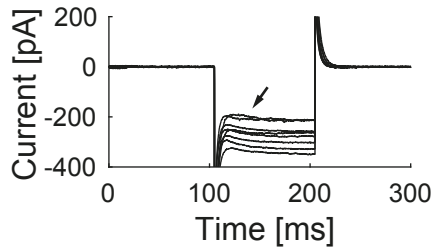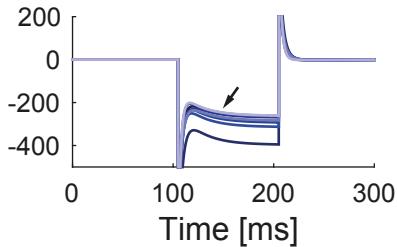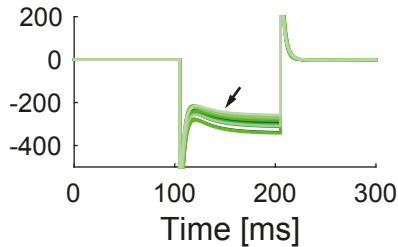

Supplement: supp [file elife-26517-supp-v2.zip]
