# Supplementary material for: T2N as a new tool for robust electrophysiological modeling demonstrated for mature and adult-born dentate granule cells
Source: eLife journal article supplement (doi:10.7554/elife.26517), 2017-11-22

*Fig. 3-fig suppl 3*

## Maximal rate of voltage change during an AP

mature GCs

young abGCs

Experimental data

Simulation  
(reconstructed GCs)

Simulation  
(synthetic GCs)

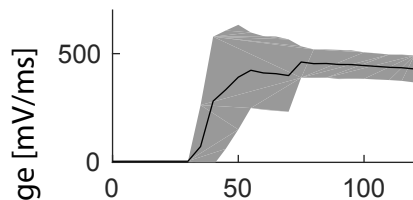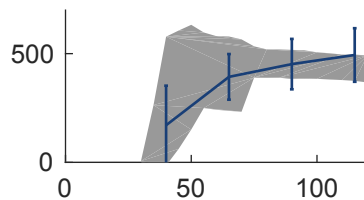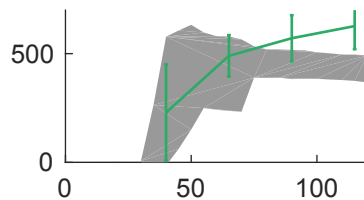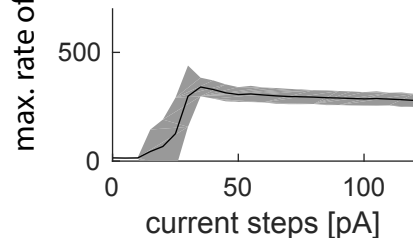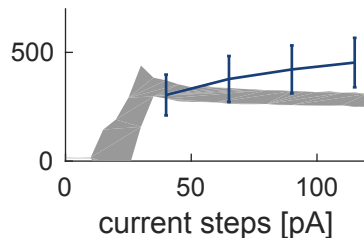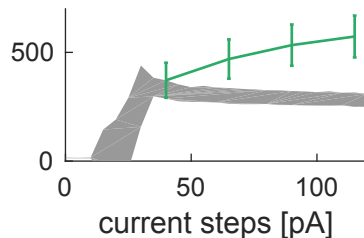

Supplement: supp [file elife-26517-supp-v2.zip]
