# Supplementary figures and images for: T2N as a new tool for robust electrophysiological modeling demonstrated for mature and adult-born dentate granule cells
Source: eLife journal article supplement (doi:10.7554/elife.26517), 2017-11-22

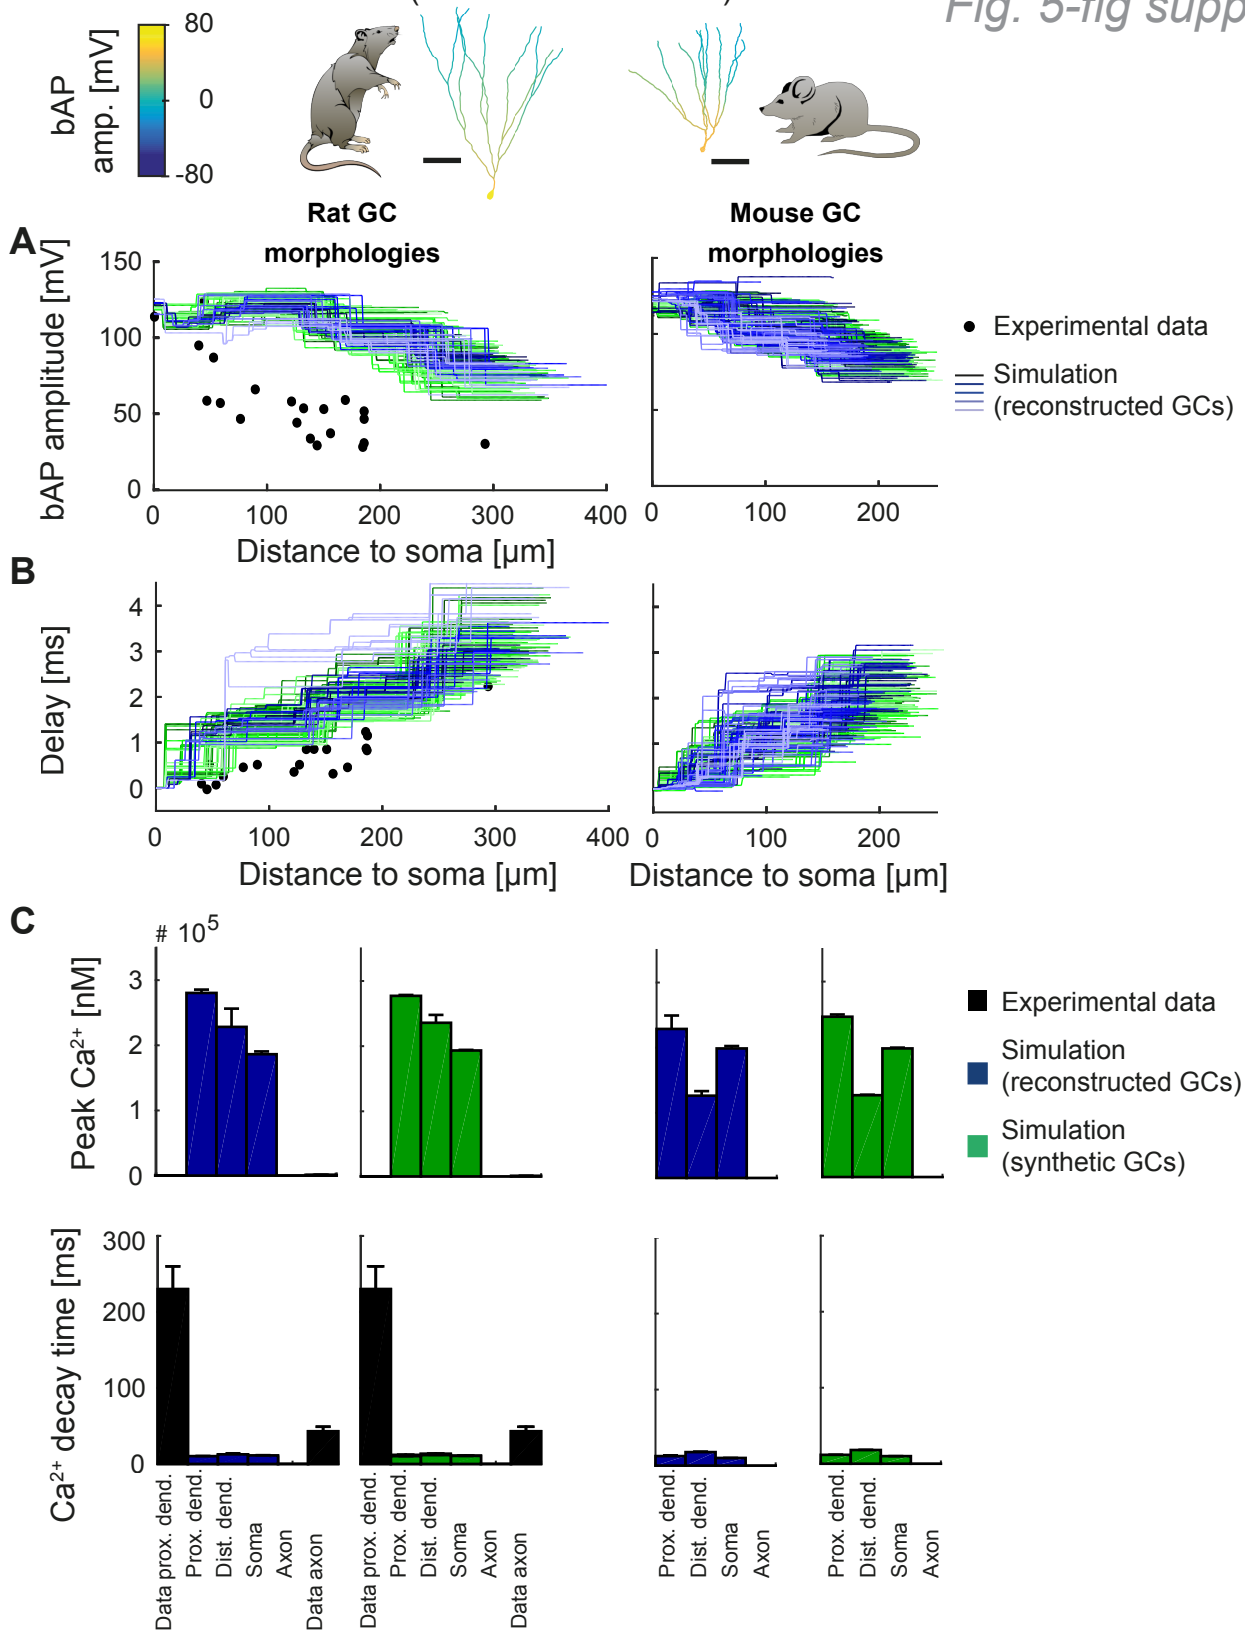

Supplement: supp [file elife-26517-supp-v2.zip]

Fig. 6-fig suppl 1

# Sensitivity analysis for a doubling of parameter values

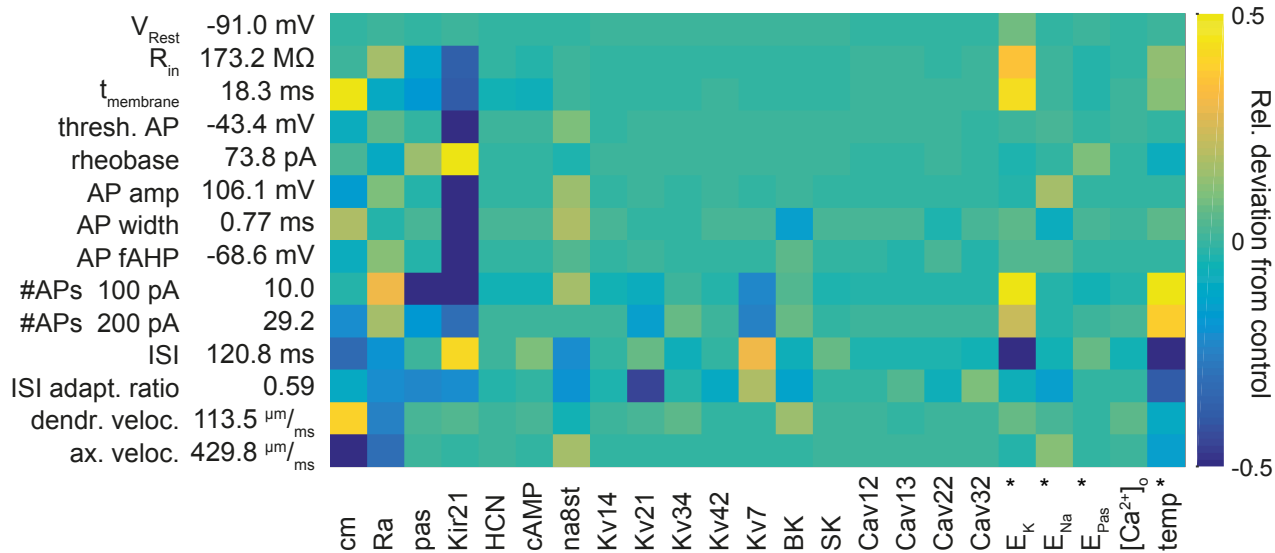

Supplement: supp [file elife-26517-supp-v2.zip]

*Fig. 4-fig suppl 1*

Model (Aradi & Holmes 1999) with rat morphologies

**A**

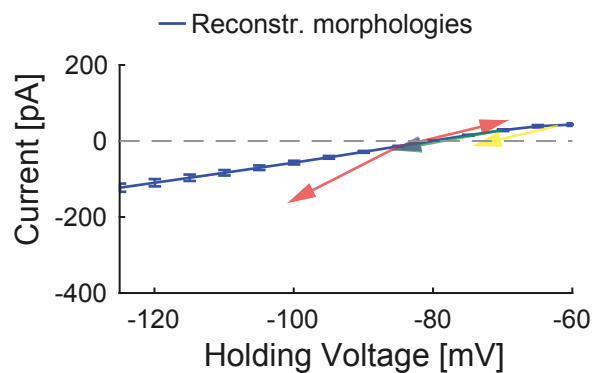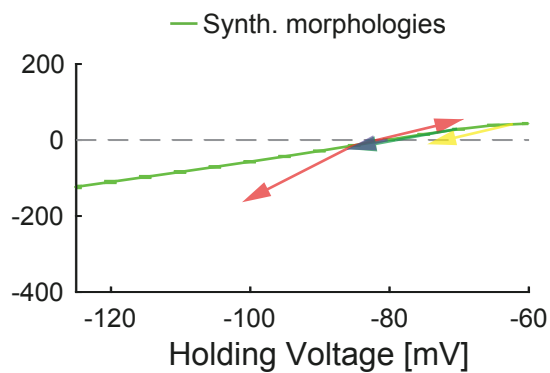

**B**

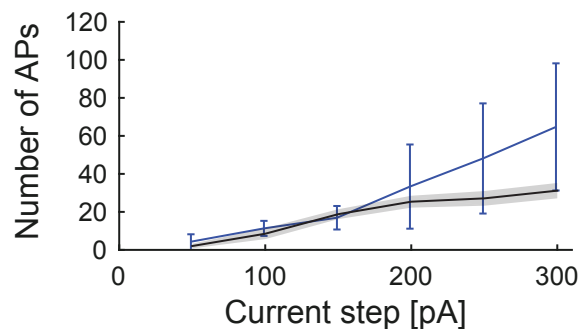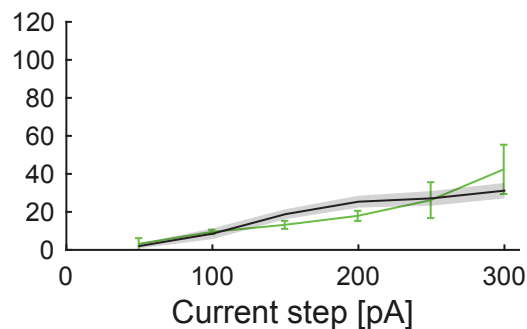

**C**

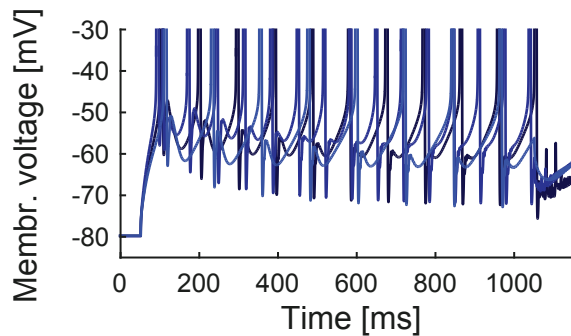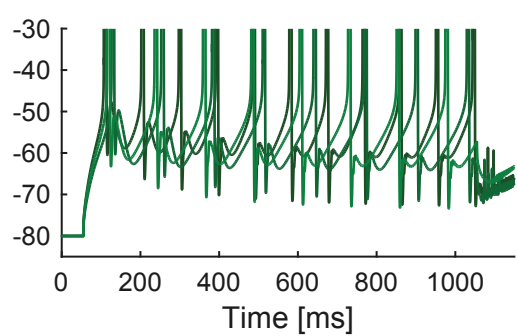

Supplement: supp [file elife-26517-supp-v2.zip]

*Fig. 6-fig suppl 2*

**Test for resonance in the rat GC model**

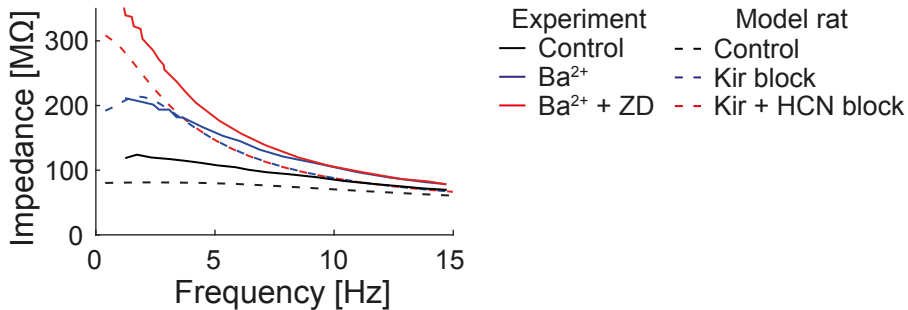

Supplement: supp [file elife-26517-supp-v2.zip]
